# Supplementary material for: Von Hippel–Lindau and Hereditary Pheochromocytoma/Paraganglioma Syndromes: Clinical Features, Genetics, and Surveillance Recommendations in Childhood
Source: Oxford University Press journal article supplement (doi:10.1158/1078-0432.ccr-17-0547), 2017-06-14
Supplement: 10780432ccr170547-sup-179453_1_supp_3999297_33x48w.docx [file 10780432ccr170547-sup-179453_1_supp_3999297_33x48w.docx]

**Supplemental Table 1- Exposures to avoid prior to testing for catecholamines and metanephrines.**

| Foods | Pharmacologic Agents |
| --- | --- |
| - Caffeinated beverages (including energy drinks) - Alcohol - Avocados - Bananas - Chocolate - Cheese - Nuts - Tobacco products | - Tricyclic Antidepressants - Monoamine Oxidase Inhibitors - Local or Inhaled Anesthetics - Cocaine - Antihistamines (H1 & H2 blockers) - Acetaminophen - or adrenergic blockers - Stimulants |
